# Supplementary material for: N4-acetylcytidine (ac4C) promotes mRNA localization to stress granules
Source: PubMed Central journal article supplement (PMC11014937; doi:10.1038/s44319-024-00098-6), 2024-02-27
Supplement: 44319_2024_98_MOESM8_ESM.pdf [file 44319_2024_98_MOESM8_ESM.pdf]

## Expanded View Figures

**Figure EV1. Determination of ac4C RNA modification level in stressed HeLa cells.**

(A) ac4C-rich RNAs localize in G3BP- and PABP-containing stress granules (SG) in response to oxidative and osmotic stresses, caused by sodium arsenite and d-sorbitol treatments, respectively. Individual SG are indicated by arrows. For panels (A,D,E) ac4C is depicted in green, PABP, G3BP or NCL in red, DAPI staining (nuclei) is in blue, scale bar 10  $\mu\text{m}$ ; (B) RNA mass spectrometry (RNA MS) analysis shows strong decrease in ac4C level in NAT10 KO HeLa cells.  $n = 3$  biological replicates, data represented as Mean  $\pm$  SD. Unpaired two-tailed  $t$ -test,  $***p < 0.001$ ; (C) Reduction in NAT10 protein level is confirmed by western blot; (D) Decreased ac4C IF signal in NAT10 KO cells suggests decreased ac4C levels in nucleoli of untreated and SG of arsenite-stressed cells. Individual organelles are indicated by arrows; (E) ac4C IF signal disappears from SG of arsenite-stressed cells in response to RNase A treatment. The levels of RNA modifications m6a, ac4C and m7G in (F) SG, (G) poly(A) RNA, (H) total RNA, (I) 18S rRNA and (J) tRNA from WT HeLa cells measured by RNA MS. Experiments are done in 2 replicates for panel (G) and three replicates for panels (F, H-J), data represented as Mean  $\pm$  SD.

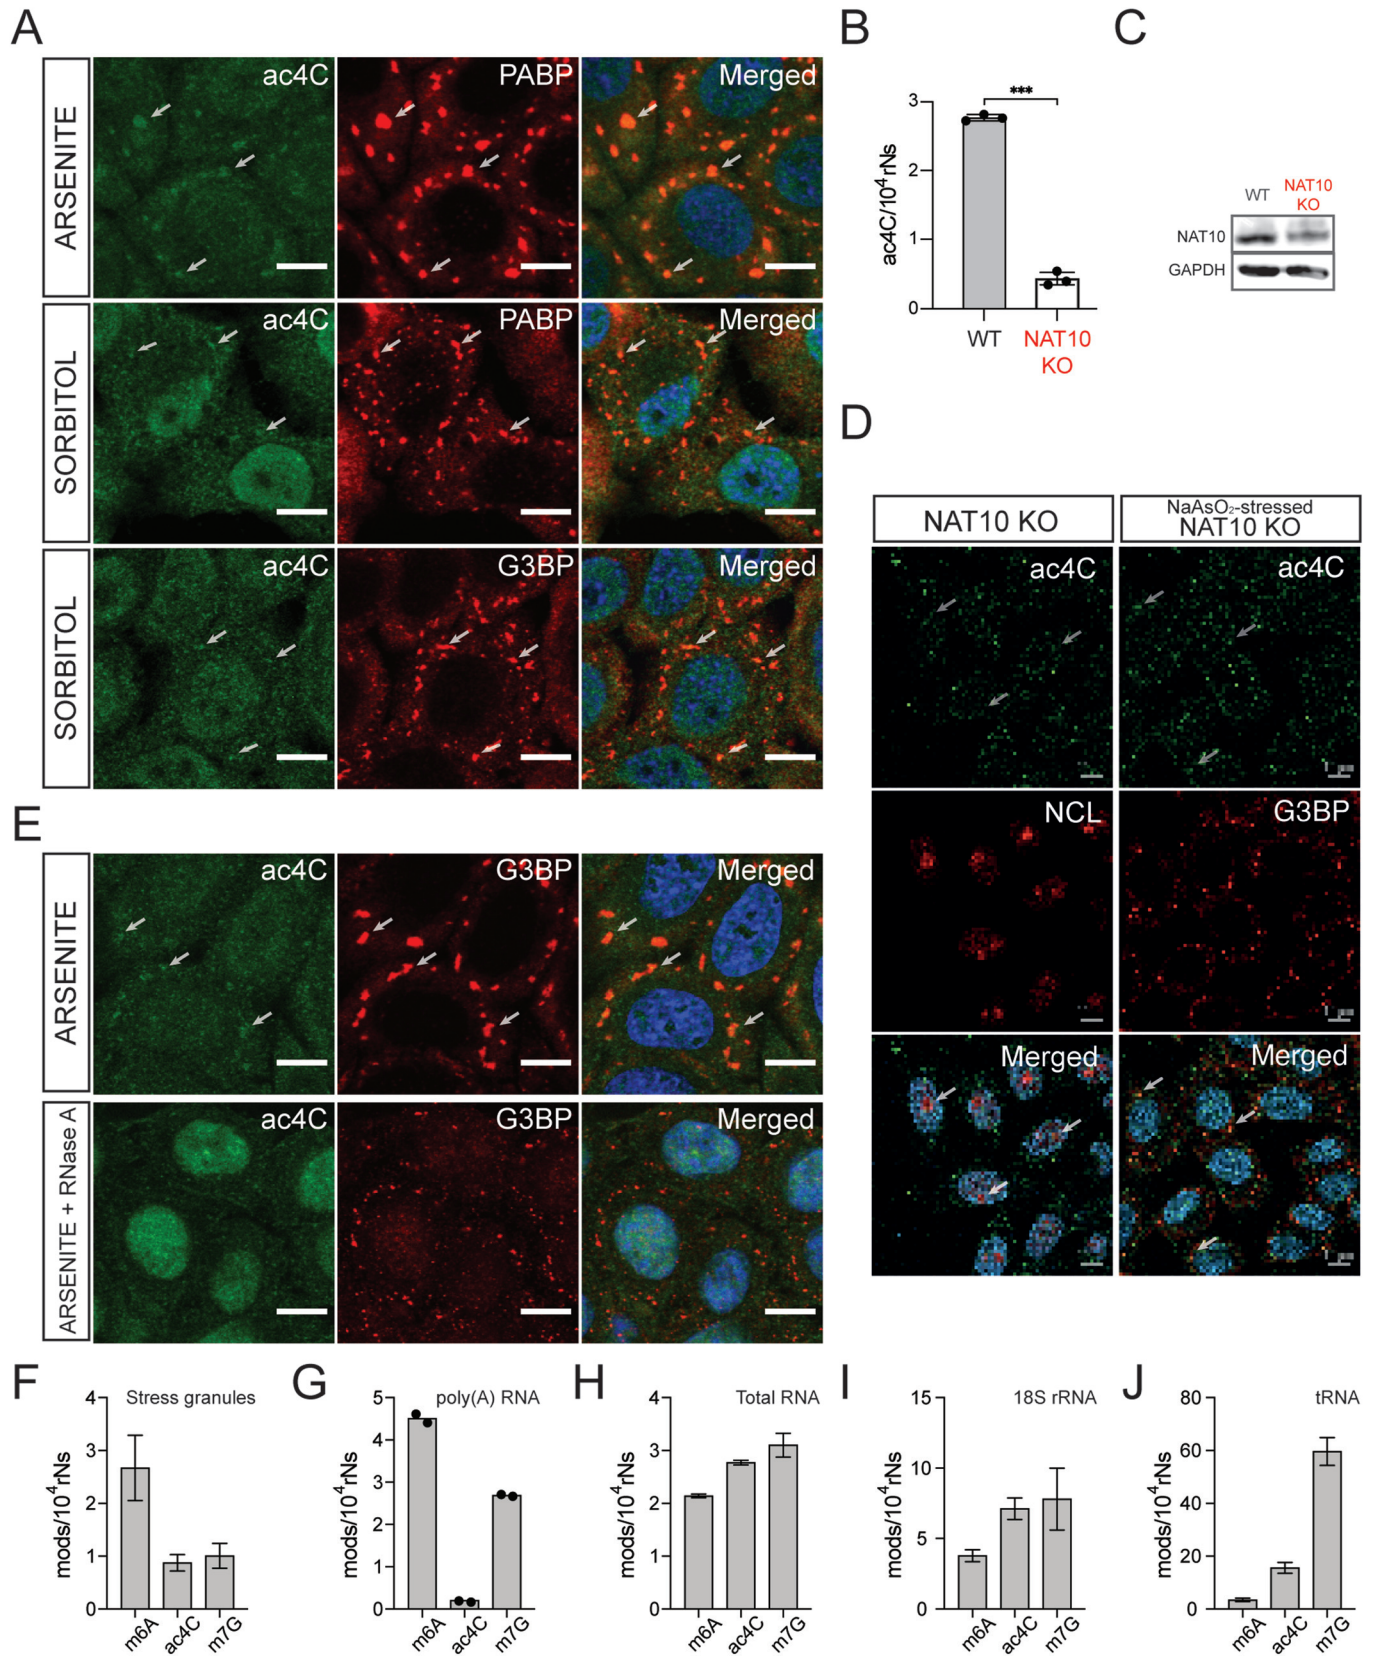

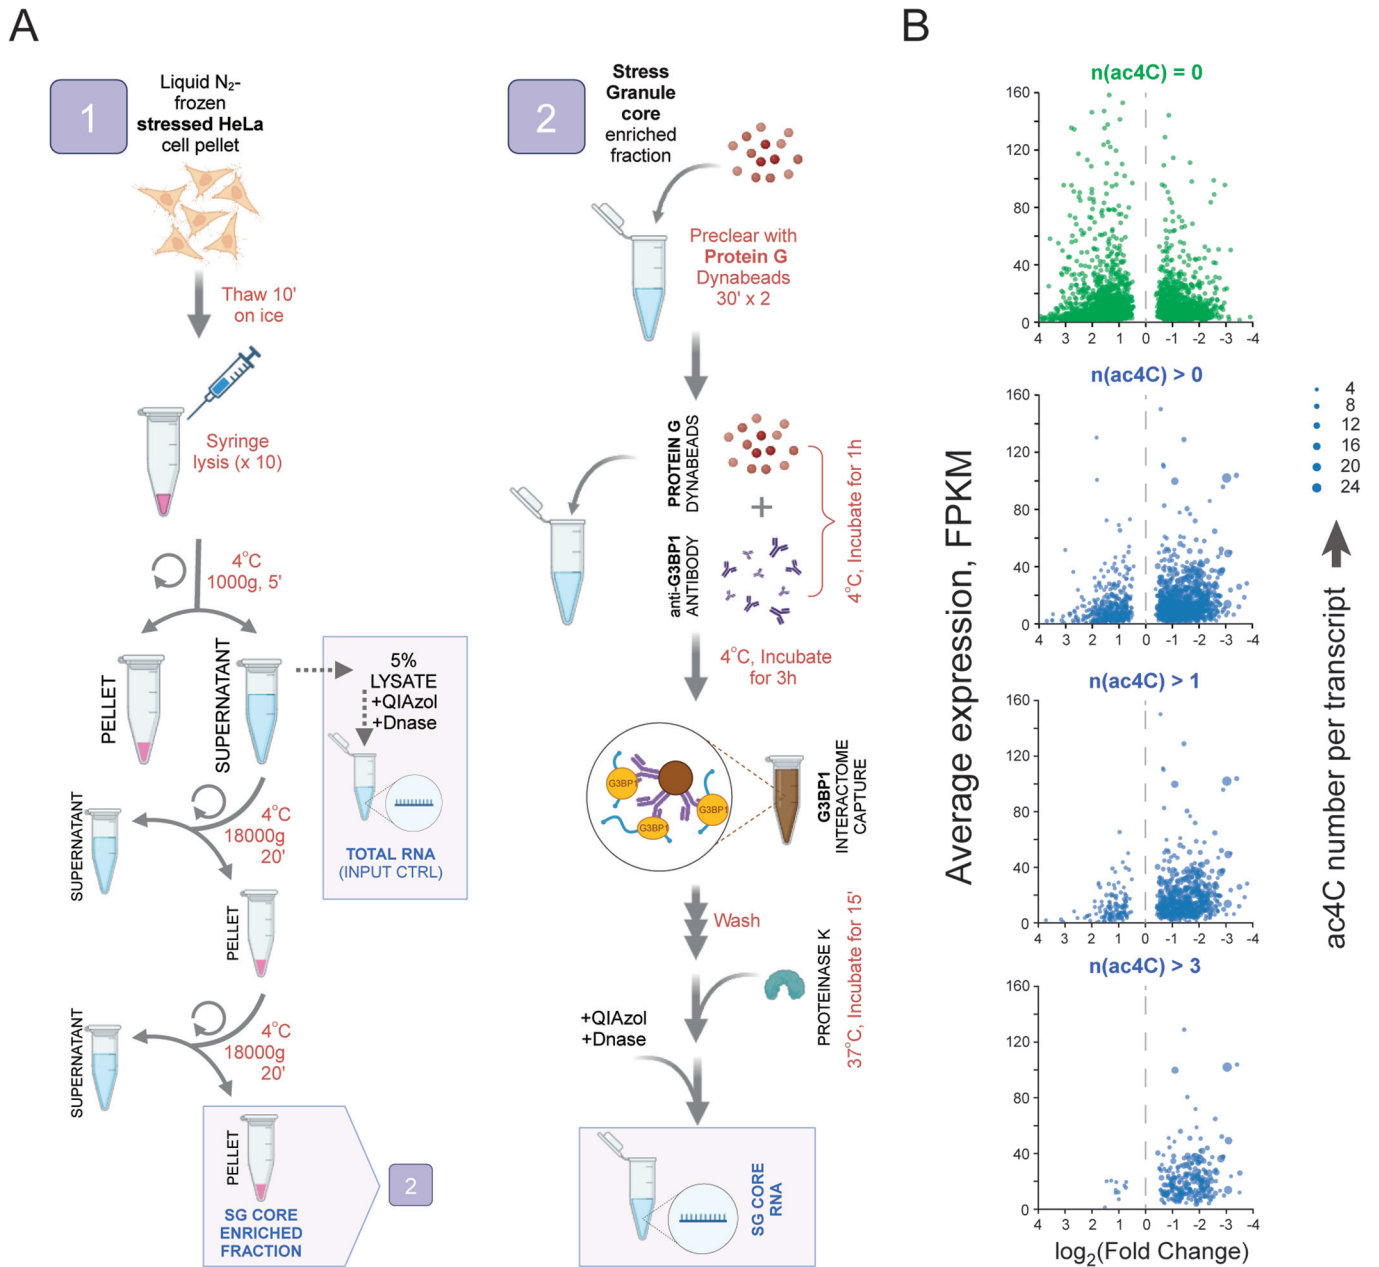

**Figure EV2. Enrichment in SG, normalized expression and ac4C counts on transcripts.**

(A) Schematic representation of SG RNA purification procedure; (B) The figure shows the transcripts with no ac4C sites ( $n = 2983$  transcripts), more than zero ac4C sites ( $n = 1792$  transcripts), more than one ac4C sites ( $n = 865$  transcripts), and more than three ac4C sites ( $n = 283$  transcripts) and the found  $\log_2$ FC between SG and total RNA (negative FC means enriched in SG) as well as average normalized expression from RNA-seq shown as FPKM. RNA sequencing experiments were performed in 4 biological replicates.

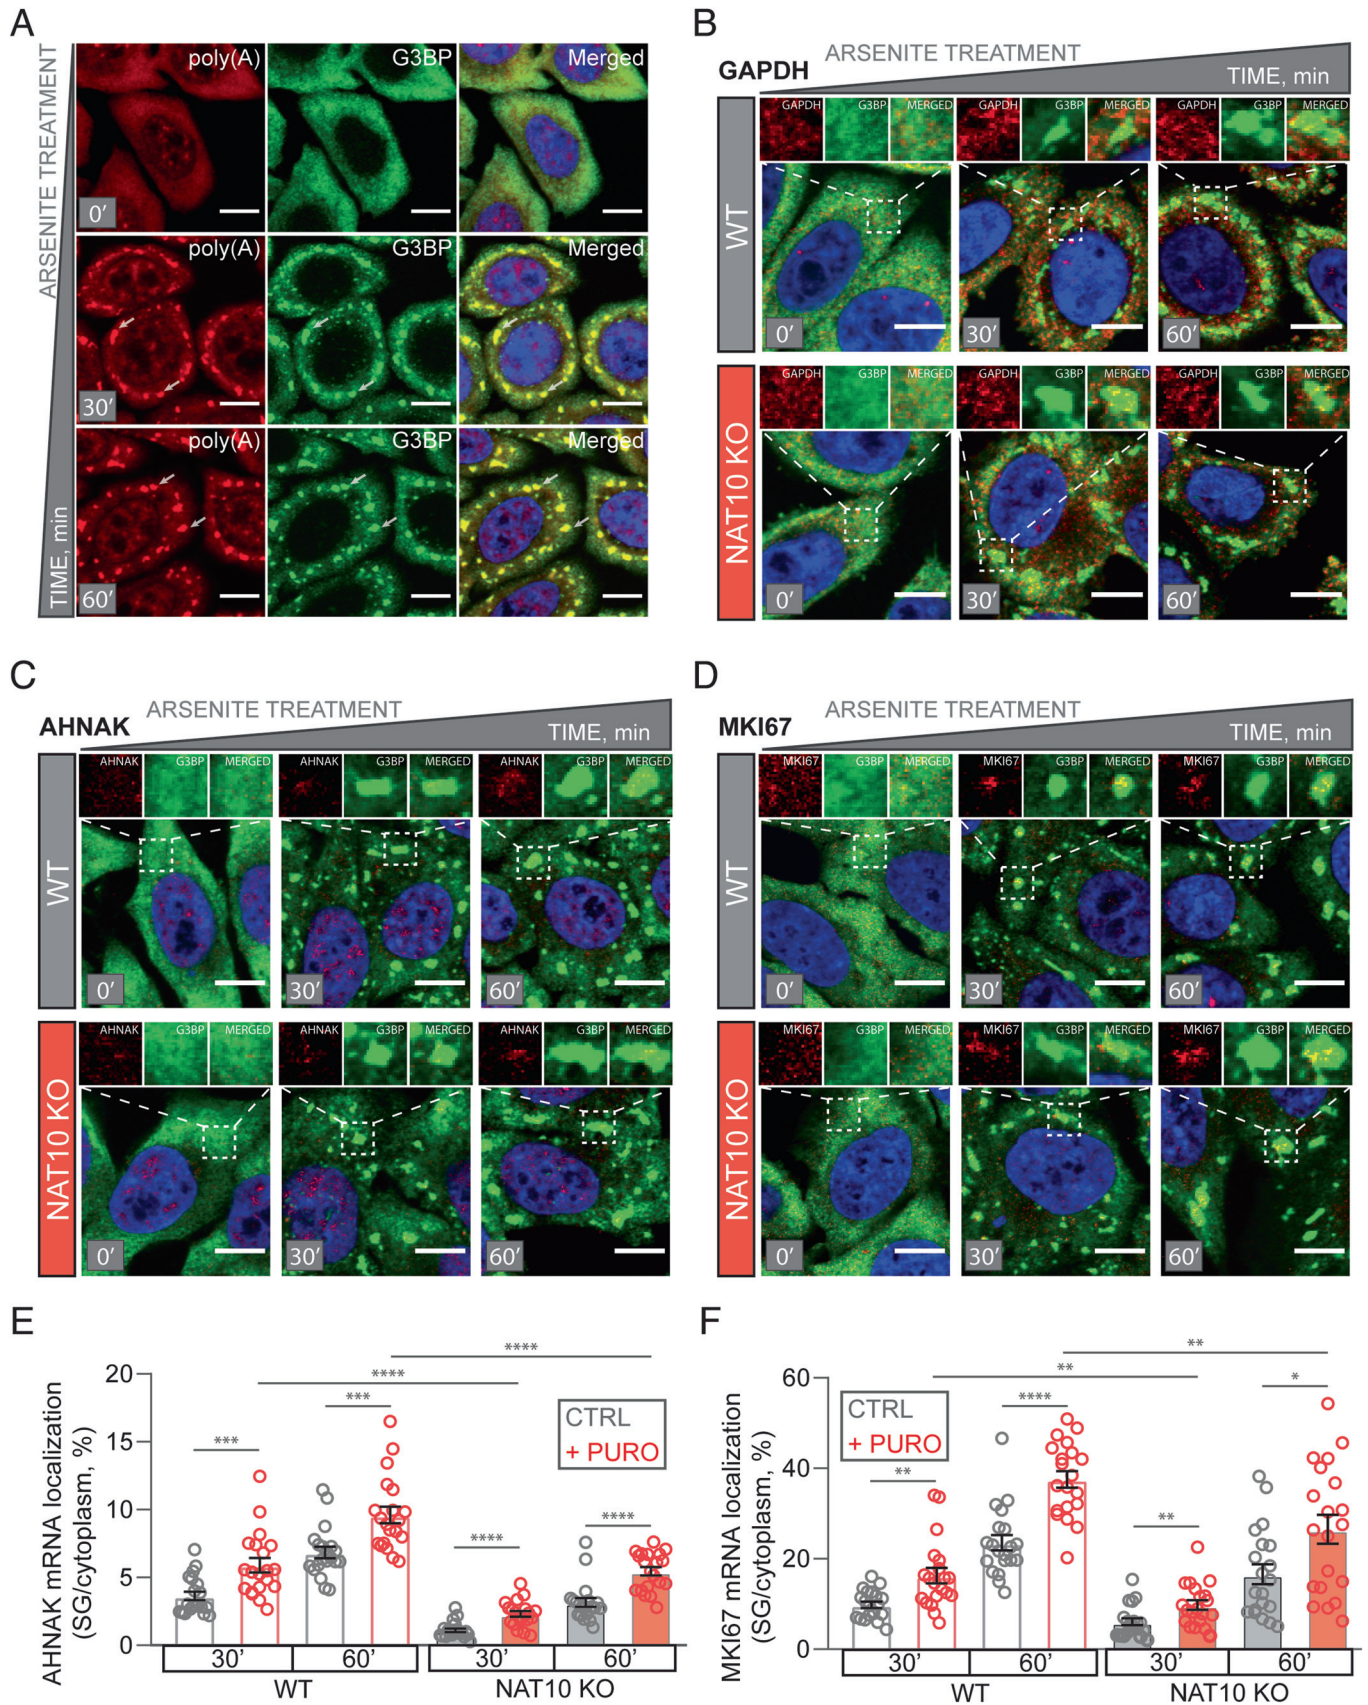

**◀ Figure EV3. mRNA localization to SG in WT and NAT10 KO HeLa cells in response to sodium arsenite treatment.**

(A) smFISH-IF microscopy images of poly(A) RNA and G3BP accumulation into SG of WT HeLa cells in response to treatment with 0.5 mM NaAsO<sub>2</sub> for 0 min, 30 min or 60 min. Arrows indicate individual SG. Poly(A) RNA is depicted in red (as well as GAPDH mRNA in (B), AHNAK mRNA in (C) and MKI67 mRNA in (D)). For panels (A–D) G3BP in green, DAPI staining (nuclei) is in blue, scale bar 10 μm; smFISH-IF microscopy images of (B) GAPDH, (C) AHNAK and (D) MKI67 mRNA localization in response to treatment with sodium arsenite with 10 μg/ml puromycin for 0 min, 30 min or 60 min in HeLa WT and NAT10 KO cells; Quantification of the fraction of AHNAK mRNA (E) and MKI67 (F) in SG per cytoplasm in different conditions. 20 cells per each condition were counted. Data represented as Mean ± SEM. Unpaired two-tailed Student's *t*-test, \**p* < 0.05, \*\**p* < 0.01, \*\*\**p* < 0.001 and \*\*\*\**p* < 0.0001.

A

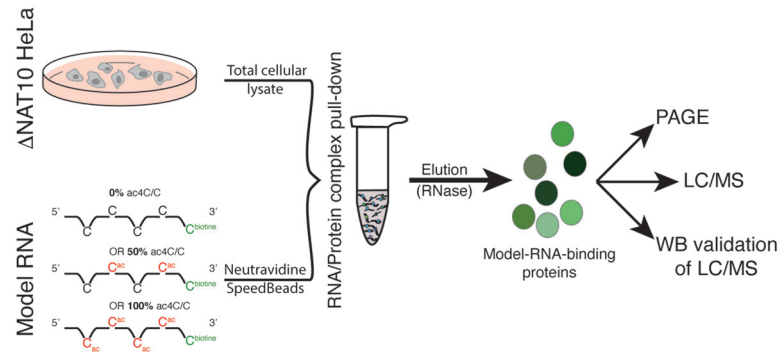

B

- 5' GGCCGCGUCGGCGGAUGUGGGAUGGCCCGGUCGAAGAAAGAGACA CCGGUCAGGAAUGUGCAUCUCACGCACAAC 3'
- 5' GGCCGCGAUGAGAU CGGUAA CCGCUCUCGCAACCGAUUACGGACCUGCCCAUUCUGUCAUGUGUGUAGACCACUC 3'
- 5' GGCCGCGUUAAGGAGUCUGAGAGCGGCAGAGCGUGGUCGUGCAACAGGUAAUUCGGCGGAUGCACUAGAUAAAGC 3'

C

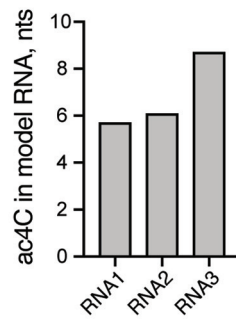

D

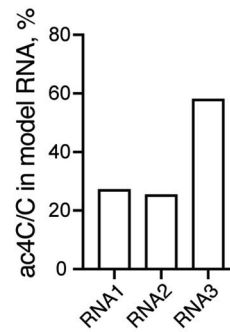

E

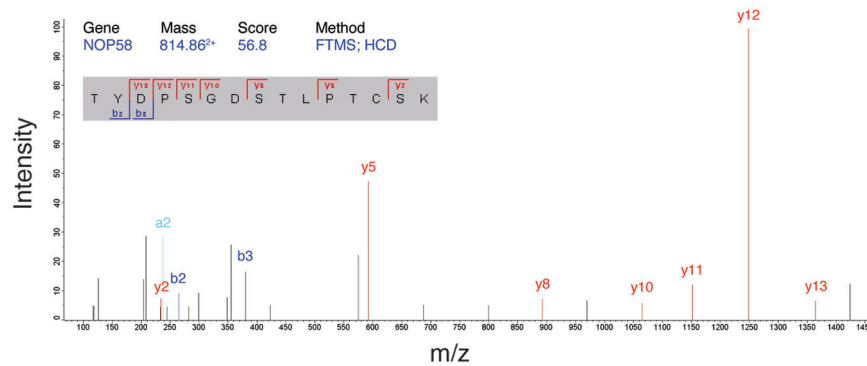

F

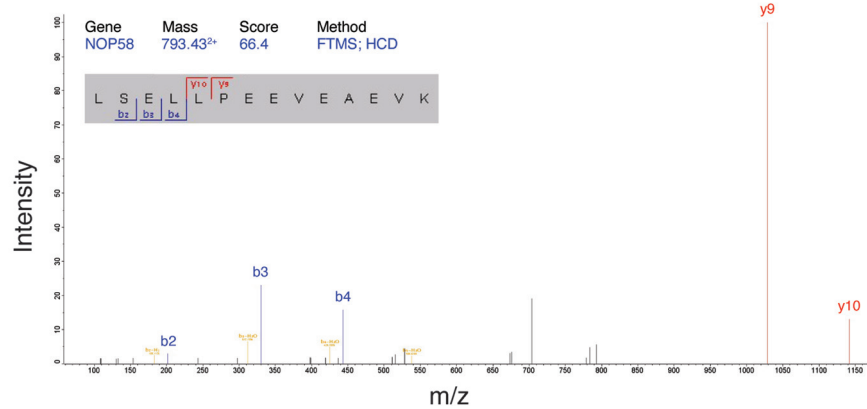

**◀ Figure EV4. Mass spectrometry identification of NOP58 as an ac4C-binding protein.**

The experimental strategy to identify ac4C-binding proteins is shown in panel (A). Panel (B) shows the sequences of three RNA oligos used in the immunoprecipitation experiments. Putative NAT10 recognition motifs (CCG) are highlighted in red. Panels (C and D) show the RNA MS analysis of oligos, where input ac4C/C ratio was 50% during IVT (in vitro transcription) and reflect on actual amount of ac4C in these oligos. (E) and (F) show peptides used to identify NOP58 in mass spectrometry experiments.
